# Supplementary material for: Rational compatibility in a ternary matrix enables all-small-molecule organic solar cells with over 16% efficiency
Source: Royal Society of Chemistry journal article supplement (doi:10.1039/d1ee00496d), 2021-01-01
Supplement: d1ee00496d1.pdf [file d1ee00496d1.pdf]

## Supplemental Information

### Rational compatibility in ternary matrix enables all-small-molecule organic solar cells with over 16% efficiency

Mengyun Jiang,<sup>a</sup> Hairui Bai,<sup>a</sup> Hongfu Zhi,<sup>a</sup> Lu Yan,<sup>a</sup> Han Young Woo,<sup>b</sup> Lijia Tong,<sup>c</sup> Jinliang Wang,<sup>a\*</sup> Fujun Zhang<sup>d\*</sup> and Qiaoshi An<sup>a\*</sup>

<sup>a</sup> Key Laboratory of Cluster Science of Ministry of Education, Beijing Key Laboratory of Photoelectric/Electrophotonic Conversion Materials, School of Chemistry and Chemical Engineering, Beijing Institute of Technology, 100081, Beijing, China.

<sup>b</sup> Department of Chemistry, Korea University, Seoul 136-713, Republic of Korea.

<sup>c</sup> Department of Basic Sciences, Air Force Engineering University, 710038, Xi'an, China.

<sup>d</sup> School of Science, Beijing Jiaotong University, 100044, Beijing, China.

\*Correspondence: jinliangwang@bit.edu.cn, fjzhang@bjtu.edu.cn and qsan@bit.edu.cn

## 1. Detailed experimental section

### Materials

The small molecules B1 (Lot# NK526B), BO-4Cl (Lot# NK610A) and Y7 (Lot# KJ822B) were purchased from Solarmer Materials Inc and used as received. PNDIT-F3N (Lot# ETL23) was purchased from eFlexPV co. Ltd and PEDOT:PSS (clevios P VP Al 4083) was purchased from H.C. Starck co. Ltd.

### ASM-OSCs fabrication and measurement

The patterned indium tin oxide (ITO) glass coated substrates (sheet resistance  $15 \Omega/\square$ ) were consecutively cleaned in ultrasonic baths containing detergent, de-ionized water and ethanol, respectively. Then, poly-(3,4-ethylenedioxythiophene):poly-(styrenesulphonicacid) (PEDOT:PSS) thin films were fabricated on the cleaned ITO substrates by spin-coating method at 5000 round per minute (RPM) for 40 s, and then annealed at  $150^\circ\text{C}$  for 10 minutes in ambient conditions. After annealing treatment, the ITO substrates coated PEDOT:PSS films were transferred to a high-purity nitrogen-filled glove box to fabricate active layers. The small molecules B1, BO-4Cl and Y7 were dissolved in chloroform (CF) to prepare  $20 \text{ mg ml}^{-1}$  blend solutions. The contents of Y7 in acceptors (Y7 and BO-4Cl) are 0 wt%, 5 wt%, 10 wt%, 15 wt%, 20 wt%, 30 wt%, 50 wt%, 100 wt%, and the weight ratio of donor to acceptor is kept constant as 1:1. The blend solutions were spin-coated on PEDOT:PSS films in a high purity nitrogen-filled glove box to fabricate the active layers. The active layers were solvent vapor annealed with chlorobenzene in a 60 mm diameter dish for 80 s. The optimized thickness of the active layer is  $\sim 100 \text{ nm}$ , which was measured by KLA-Tencor Alpha-Step D-600 Stylus Profiler. After that, PNDIT-F3N solution ( $0.5 \text{ mg ml}^{-1}$  in methanol with 0.5 vol% acetic acid) was spin-coated on the top of active layers at 2000 RPM for 30 s. The cathode of Ag was deposited by thermal evaporation with a shadow mask under  $10^{-4} \text{ Pa}$  and the thickness of 100 nm was monitored by a quartz crystal microbalance. The active area of all-small-molecule organic solar cells (ASM-OSCs) is about  $4 \text{ mm}^2$ , which is defined by the overlap of ITO anode and Ag cathode.

### Characterizations on films and ASM-OSCs

The ultraviolet-visible (UV-Vis) absorption spectra of pure B1, BO-4Cl and Y7 films were obtained using a Shimadzu UV-3101 PC spectrometer. The current density-voltage ( $J$ - $V$ ) curves of ASM-OSCs were measured in a high-purity nitrogen-filled glove box using a Keithley B2901A source meter. AM 1.5G irradiation at 100 mW cm<sup>-2</sup> is provided by a simulator (SS-F5-3A, Enlitech, AAA grade, 70×70 mm<sup>2</sup> photobeam size) in glove box, which was calibrated by standard silicon solar cells (purchased from Enlitech). The external quantum efficiency (EQE) and internal quantum efficiency (IQE) spectra of ASM-OSCs were measured in air conditions by a solar cell spectral response measurement system (QE-R3011, Enlitech).

### TPC, TPV and Photo-CELIV

Transient photovoltage (TPV), transient photocurrent (TPC) and photo-induce charge extraction linear increasing voltage (Photo-CELIV) were conducted with the Paioscarrier measurement system (FLUXiM AG, Switzerland). A high-power white LED is utilized as light source for TPV, TPC and photo-CELIV measurements. The integrated power of the LED is 72 mW cm<sup>-2</sup>, and the spectrum distribution is mainly in the wavelength range of 440–470 nm and 540–630 nm, and the peak value located at 460 nm and 550 nm.

### Charge mobility measurement by SCLC method

The structure of electron-only devices is ITO/ZnO/active layer/PDIN/Al and the structure of hole-only devices is ITO/PEDOT:PSS/active layer/MoO<sub>3</sub>/Ag. The fabrication conditions of the active layer films are same with those for the OSCs. The charge mobilities are generally described by the Mott-Gurney equation<sup>1-3</sup>:

$$J = \frac{9}{8} \varepsilon_r \varepsilon_0 \mu \frac{V^2}{L^3} \quad (1)$$

where  $J$  is the current density,  $\varepsilon_0$  is the permittivity of free space ( $8.85 \times 10^{-14}$  F/cm),  $\varepsilon_r$  is the dielectric constant of used materials,  $\mu$  is the charge mobility,  $V$  is the applied voltage and  $L$  is the active layer thickness. The  $\varepsilon_r$  parameter is assumed to be 3, which is a typical value for organic materials. In organic materials, charge mobility is usually field dependent and can be described by the disorder formalism, typically varying with electric field,  $E=V/L$ , according to the equation<sup>4-6</sup>:

$$\mu = \mu_0 \exp[0.89\gamma \sqrt{\frac{V}{L}}] \quad (2)$$

where  $\mu_0$  is the charge mobility at zero electric field and  $\gamma$  is a constant. Then, the Mott-Gurney equation can be described by:

$$J = \frac{9}{8} \varepsilon_r \varepsilon_0 \mu_0 \frac{V^2}{L^3} \exp[0.89\gamma \sqrt{\frac{V}{L}}] \quad (3)$$

In this case, the charge mobilities were estimated using the following equation:

$$\ln\left(\frac{JL^3}{V^2}\right) = 0.89\gamma \sqrt{\frac{V}{L}} + \ln\left(\frac{9}{8} \varepsilon_r \varepsilon_0 \mu_0\right) \quad (4)$$

## AFM, TEM and GIWAXS

The surface morphology of the active layers was investigated by an optical microscope (OM) and atomic force microscopy (AFM) using a Dimension Icon AFM (Bruker) in a tapping mode. transmission electron microscopy (TEM) images of the active layers were obtained by using a JEOL JEM-1400 transmission electron microscope operated at 80 kV. The samples for AFM and TEM characterization were prepared under the same conditions compared with the active layers of the ASM-OSCs. The samples for TEM measurement were prepared by dissolving the PEDOT:PSS layer using deionized water and picked up the active layer using 400-mesh copper TEM grids. 2D Grazing-Incidence Wide-Angle X-ray Scattering (GIWAXS) measurements were carried out at the PLSII 9A U-SAXS beam line of Pohang Accelerator Laboratory, Korea.

## 2. Additional experimental results

The compatibility between two different materials can be evaluated by employing the equation:

$$\gamma_{A-B} = \gamma_A + \gamma_B - 4 \left( \frac{\gamma_A^d \gamma_B^d}{\gamma_A^d + \gamma_B^d} + \frac{\gamma_A^p \gamma_B^p}{\gamma_A^p + \gamma_B^p} \right) \quad (5)$$

where  $\gamma_{A-B}$  represents interfacial tension between material A and B.  $\gamma_A$  and  $\gamma_B$  are the surface tension of A and B, respectively. The superscript d and p represent the dispersion and polar components calculated using the contact angle with water and ethylene glycol (EG). The interfacial tension  $\gamma_{BO-4Cl-Y7} \approx 0.09 \text{ mN m}^{-1}$  is much smaller than  $\gamma_{B1-BO-4Cl} \approx 0.13 \text{ mN m}^{-1}$  and  $\gamma_{B1-Y7} \approx 0.42 \text{ mN m}^{-1}$ , suggesting the good compatibility between BO-4Cl and Y7.

**Table S1.** Contact angle (CA), surface tension, Flory–Huggins interaction parameter ( $\chi$ ) and interfacial tension ( $\gamma$ ) of the used materials,

| X      | Water CA<br>[°] | EG CA<br>[°] | $\gamma^d$<br>[mN m <sup>-1</sup> ] | $\gamma^p$<br>[mN m <sup>-1</sup> ] | Surface tension<br>[mN m <sup>-1</sup> ] | $\chi_{BO-4Cl-X}$ | $\chi_{Y7-X}$ | $\gamma_{BO-4Cl-X}$<br>[mN m <sup>-1</sup> ] | $\gamma_{Y7-X}$<br>[mN m <sup>-1</sup> ] |
|--------|-----------------|--------------|-------------------------------------|-------------------------------------|------------------------------------------|-------------------|---------------|----------------------------------------------|------------------------------------------|
| B1     | 94.84           | 72.86        | 12.63                               | 10.40                               | 23.0                                     | 0.042             | 0.104         | 0.13                                         | 0.42                                     |
| BO-4Cl | 90.78           | 68.91        | 12.74                               | 12.25                               | 25.0                                     | -                 | 0.014         | -                                            | 0.09                                     |
| Y7     | 88.22           | 66.93        | 12.47                               | 13.74                               | 26.2                                     | 0.014             | -             | 0.09                                         | -                                        |

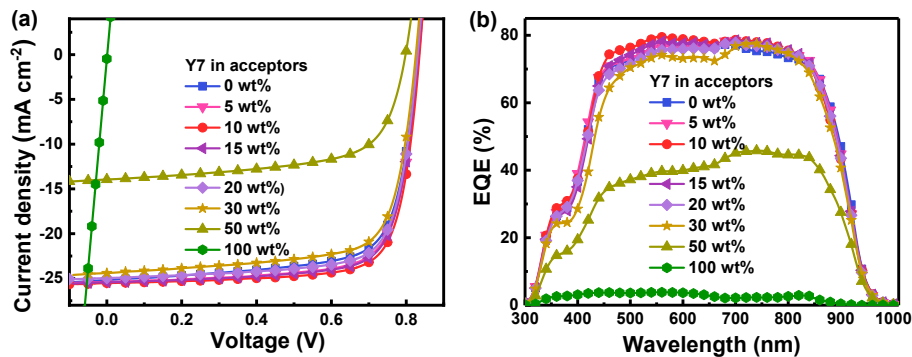

**Figure S1.** (a)  $J$ - $V$  curves of ASM-OSCs with various Y7 content in acceptors under AM 1.5 G illumination at intensity of  $100 \text{ mW cm}^{-2}$ . (b) The EQE spectra of the corresponding ASM-OSCs.

The negligible power conversion efficiency (PCE) and open-circuit voltage ( $V_{OC}$ ) of Y7-based binary cells ( $D/A=1/1$ ) is probably related to the coarse morphology caused by the inferior solubility of Y7 and poor

compatibility between B1 and Y7. Y7 exhibit quite low solubility in chloroform, which is about 5 mg ml<sup>-1</sup>. The photovoltaic properties of Y7-based binary cells with different D/A ratios were further studied, the concentration of donor is maintained as 10 mg ml<sup>-1</sup>. The optimized Y7-based binary cells (D/A=1/0.3) achieve a PCE of 2.07% with a short-circuit current density ( $J_{SC}$ ) of 9.71 mA cm<sup>-2</sup>, a  $V_{OC}$  of 0.681 V and a fill factor (FF) of 31.22%.

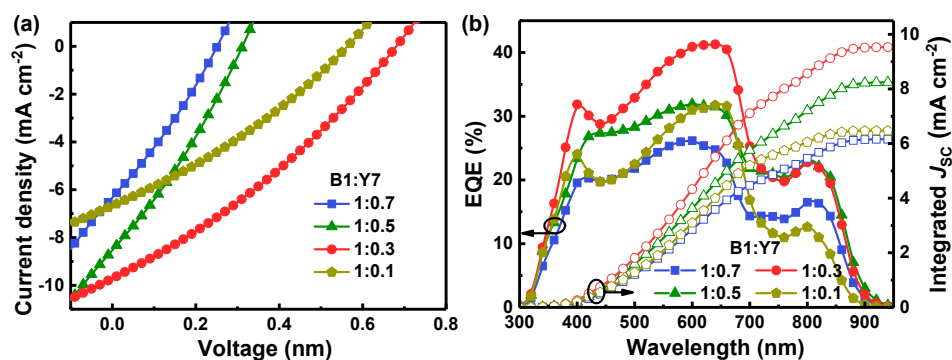

**Figure S2.** (a)  $J$ - $V$  curves, (b) EQE spectra of Y7-based binary cells with different D/A ratios.

**Table S2.** Photovoltaic parameters of Y7-based binary cells with different D/A ratios

| B1:Y7 | $J_{SC}$<br>[mA cm <sup>-2</sup> ] | Cal. $J_{SC}$<br>[mA cm <sup>-2</sup> ] | $V_{OC}$<br>[V] | FF<br>[%] | PCE<br>[%] |
|-------|------------------------------------|-----------------------------------------|-----------------|-----------|------------|
| 1:0.7 | 6.33                               | 6.16                                    | 0.251           | 28.82     | 0.46       |
| 1:0.5 | 8.53                               | 8.25                                    | 0.312           | 29.66     | 0.79       |
| 1:0.3 | 9.71                               | 9.53                                    | 0.681           | 31.22     | 2.07       |
| 1:0.1 | 6.67                               | 6.43                                    | 0.564           | 30.95     | 1.16       |

**Table S3.** Summary of the photovoltaic parameters for recent reported efficient ASM-OSCs.

| System                        | $J_{SC}$<br>[mA cm <sup>-2</sup> ] | FF<br>[%] | $V_{OC}$<br>[V] | PCE<br>[%] | Reference    |
|-------------------------------|------------------------------------|-----------|-----------------|------------|--------------|
| B1:BO-4Cl:Y7                  | 25.52                              | 76.29     | 0.836           | 16.28      | In this work |
| ZnP-TSEH:6TIC:4TIC            | 25.95                              | 75.57     | 0.81            | 15.88      | 7            |
| BTR-Cl:Y6:PC <sub>71</sub> BM | 23.75                              | 77.11     | 0.84            | 15.34      | 8            |
| B1:BO-4Cl                     | 25.27                              | 73        | 0.83            | 15.3       | 9            |
| TBD-S4:Y6                     | 24.53                              | 72.1      | 0.854           | 15.1       | 10           |
| ZR2-C3:Y6                     | 24.69                              | 70.06     | 0.854           | 14.78      | 11           |
| BTR-Cl:Y6                     | 23.83                              | 74.7      | 0.83            | 14.7       | 12           |
| ZR1:Y6                        | 24.34                              | 68.44     | 0.861           | 14.34      | 13           |
| BT-2F:N3                      | 23.81                              | 70.22     | 0.84            | 14.09      | 14           |
| SM1-F:Y6                      | 23.25                              | 69.9      | 0.866           | 14.07      | 15           |
| BTTZR:Y6                      | 23.2                               | 68        | 0.88            | 13.9       | 16           |
| BSFTR:Y6                      | 23.16                              | 69.66     | 0.85            | 13.69      | 17           |
| BTR:NIT:PC <sub>71</sub> BM   | 19.5                               | 73.83     | 0.94            | 13.63      | 18           |
| BTR-Cl:Y6                     | 24.17                              | 65.5      | 0.86            | 13.61      | 19           |
| BTEC-2F:Y6                    | 21.55                              | 72.35     | 0.85            | 13.34      | 20           |

The absorption spectra of active layers ( $R_1$ - $R_2$ ) were calculated by subtracting the parasitic absorptions ( $1-R_1$ ) from the total absorption in ASM-OSCs ( $1-R_2$ ), where  $R_1$  is the reflection spectrum of the standard sample of the equipment,  $R_2$  is the reflection spectra of ASM-OSCs with structure of ITO/PEDOT:PSS/active layers/PNDIT-F3N/Al. The internal quantum efficiency (IQE) spectra can be obtained according to the equation of  $EQE/(R_1-R_2)$ . The intact absorption spectra of active layer in the typical ASM-OSCs and corresponding IQE spectra is shown in **Figure S3**.

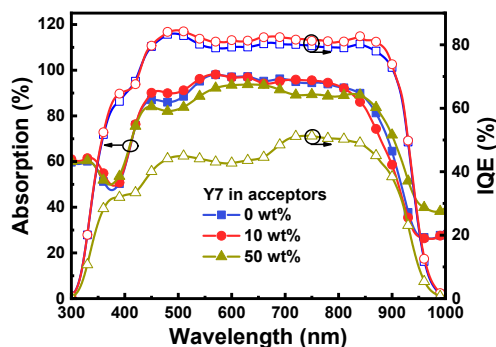

**Figure S3.** Absorption spectra of active layer in the typical ASM-OSCs and the corresponding IQE spectra.

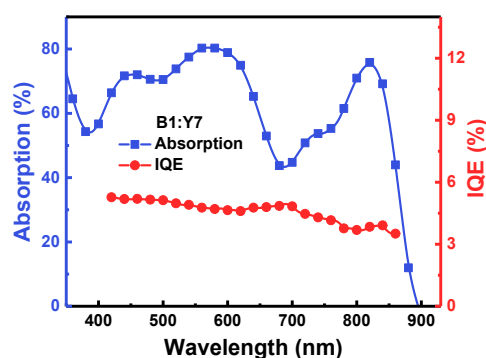

**Figure S4.** Absorption spectra of active layer in Y7-based binary cells ( $D/A=1:1$ ) and the corresponding IQE spectra.

**Table S4.** Key parameters of the typical ASM-OSCs

| Y7 in acceptors<br>[wt%] | $J_{\text{sat}}$<br>[mA cm <sup>-2</sup> ] | $J_{\text{ph}}^*$<br>[mA cm <sup>-2</sup> ] | $J_{\text{ph}}^\&$<br>[mA cm <sup>-2</sup> ] | $J_{\text{ph}}^*/J_{\text{sat}} (\eta_g)$<br>[%] | $J_{\text{ph}}^\&/J_{\text{sat}} (\eta_e)$<br>[%] |
|--------------------------|--------------------------------------------|---------------------------------------------|----------------------------------------------|--------------------------------------------------|---------------------------------------------------|
| 0                        | 26.55                                      | 25.18                                       | 22.18                                        | 94.84                                            | 83.54                                             |
| 10                       | 26.61                                      | 25.52                                       | 23.23                                        | 95.90                                            | 87.30                                             |
| 50                       | 17.02                                      | 13.95                                       | 11.09                                        | 81.96                                            | 65.16                                             |

$J_{\text{sat}}$ : The  $J_{\text{ph}}$  under condition of  $V_{\text{eff}}=3$  V

$J_{\text{ph}}^*$ : The  $J_{\text{ph}}$  under short circuit conditions

$J_{\text{ph}}^\&$ : The  $J_{\text{ph}}$  under maximum power output conditions

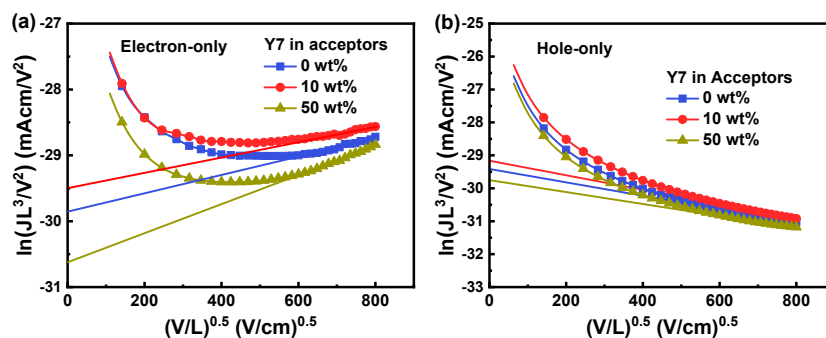

**Figure S5.** The  $\ln(JL^3/V^2)$  vs  $(V/L)^{0.5}$  curves of (a) electron-only ITO/ZnO/active layer/PNDIT-F3N/Al devices and (b) hole-only ITO/PEDOT:PSS/active layer/MoO<sub>3</sub>/Ag devices.

**Table S5.** The electron mobility ( $\mu_e$ ), hole mobility ( $\mu_h$ ) values of the active layers with various Y7 content.

| Y7 in acceptors<br>[ wt%] | $\mu_e$ [cm <sup>2</sup> V <sup>-1</sup> s <sup>-1</sup> ]<br>Max (Avg.±Dev. <sup>a</sup> ) | $\mu_h$ [cm <sup>2</sup> V <sup>-1</sup> s <sup>-1</sup> ]<br>Max (Avg.±Dev. <sup>a</sup> ) |
|---------------------------|---------------------------------------------------------------------------------------------|---------------------------------------------------------------------------------------------|
| 0                         | 3.60 (3.21±0.41)×10 <sup>-4</sup>                                                           | 5.76 (5.48±0.30)×10 <sup>-4</sup>                                                           |
| 10                        | 5.16 (4.85±0.33)×10 <sup>-4</sup>                                                           | 7.11 (6.95±0.26)×10 <sup>-4</sup>                                                           |
| 50                        | 1.66 (1.14±0.54)×10 <sup>-4</sup>                                                           | 4.02 (3.57±0.46)×10 <sup>-4</sup>                                                           |

<sup>a</sup>) Average (Avg.) mobility values and the deviations (Dev.) based on individual 10 cells

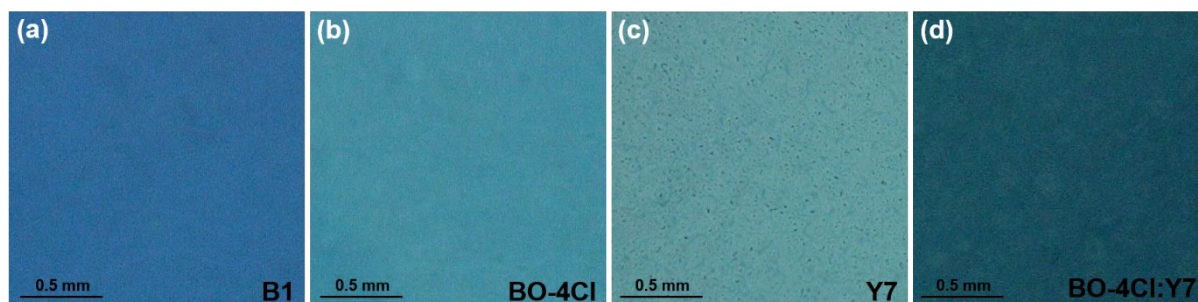

**Figure S6.** OM images of pure films and BO-4Cl:Y7 (1:1) blend films, the pure films are prepared based on the solution with concentration of 10 mg ml<sup>-1</sup> and the blend films are fabricated with 20 mg ml<sup>-1</sup> solution.

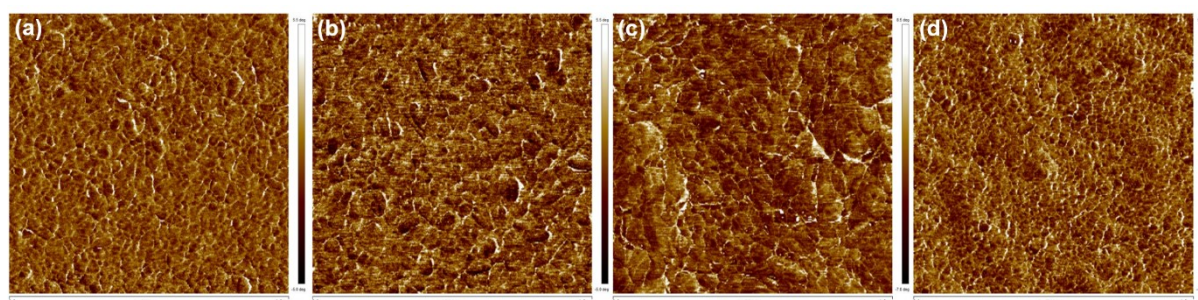

**Figure S7.** AFM phase images of blend films with (a) 0 wt%, (b) 10 wt%, (c) 50 wt% and (d) 100 wt% Y7 in acceptors.

**Table S6.** Crystallographic parameters of neat and blend films for the used materials. OOP: out-of-plane. IP: in-plane. CCL: crystal coherence length.

| Component | IP               |             |                  |             | OOP              |             |                  |             |
|-----------|------------------|-------------|------------------|-------------|------------------|-------------|------------------|-------------|
|           | 100              |             | 010              |             | 100              |             | 010              |             |
|           | d-spacing<br>(Å) | CCL<br>(nm) | d-spacing<br>(Å) | CCL<br>(nm) | d-spacing<br>(Å) | CCL<br>(nm) | d-spacing<br>(Å) | CCL<br>(nm) |
| B1        | -                | -           | 3.65             | 7.85        | 20.26            | 19.4        | -                | -           |
| BO-4Cl    | 16.10            | 5.10        | -                | -           | -                | -           | 3.67             | 2.18        |
| Y7        | 14.60            | 9.72        | -                | -           | -                | -           | 3.67             | 2.49        |
| B1:BO-4Cl | 20.93            | 6.90        | -                | -           | 15.67            | -           | 3.76             | 2.88        |
| 10 wt% Y7 | 20.26            | 13.36       | -                | -           | -                | -           | 3.70             | 4.25        |
| 50 wt% Y7 | 20.26            | 9.37        | -                | -           | -                | -           | 3.70             | 3.79        |
| B1:Y7     | 20.26            | 7.21        | 3.62             | -           | -                | -           | 3.69             | 3.29        |

## Reference

1. H. Cha, D. S. Chung, S. Y. Bae, M. J. Lee, T. K. An, J. Hwang, K. H. Kim, Y. H. Kim, D. H. Choi, C. E. Park, *Adv. Funct. Mater.* 2013, **23**, 1556.
2. S. Y. Chang, H. C. Liao, Y. T. Shao, Y. M. Sung, S. H. Hsu, C. C. Ho, W. F. Su, Y. F. Chen, *J. Mater. Chem. A* 2013, **1**, 2447.
3. Y. Zhang, D. Deng, K. Lu, J. Zhang, B. Xia, Y. Zhao, J. Fang, Z. Wei, *Adv. Mater.* **2015**, 27, 1071.
4. Z. S. An, J. S. Yu, S. C. Jones, S. Barlow, S. Yoo, B. Domercq, P. Prins, L. D. A. Siebbeles, B. Kippelen, S. R. Marder, *Adv. Mater.* 2005, **17**, 2580.
5. M. Koppe, H. J. Egelhaaf, G. Dennler, M. C. Scharber, C. J. Brabec, P. Schilinsky, C. N. Hoth, *Adv. Funct. Mater.* 2010, **20**, 338.
6. Y. X. Chen, X. Zhang, C. L. Zhan, J. N. Yao, *ACS Appl. Mater. Interfaces*. 2015, **7**, 6462.
7. L. Nian, Y. Kan, K. Gao, M. Zhang, N. Li, G. Zhou, S. B. Jo, X. Shi, F. Lin, Q. Rong, *Joule* 2020, **4**, 2223.
8. D. Hu, Q. Yang, H. Chen, F. Wobben, V. M. Le Corre, R. Singh, T. Liu, R. Ma, H. Tang, L. J. A. Koster, *Energy Environ. Sci.* 2020, **13**, 2134.
9. J. Qin, C. An, J. Zhang, K. Ma, Y. Yang, T. Zhang, S. Li, K. Xian, Y. Cui, Y. Tang, *Sci. China Mater.* 2020, **63**, 1142.
10. X. Wang, J. Wang, J. Han, D. Huang, P. Wang, L. Zhou, C. Yang, X. Bao, R. Yang, *Nano Energy* 2020, DOI: 10.1016/j.nanoen.2020.105612.
11. R. Zhou, Z. Jiang, Y. Shi, Q. Wu, C. Yang, J. Zhang, K. Lu, Z. Wei, *Adv. Funct. Mater.* 2020, **30**, 2005426.
12. H. Tang, H. Y. Chen, C. Q. Yan, J. M. Huang, P. W. K. Fong, J. Lv, D. Q. Hu, R. Singh, M. Kumar, Z. Y. Xiao, Z. P. Kan, S. R. Lu, G. Li, *Adv. Energy Mater.* 2020, **10**, 2001076.

13. R. M. Zhou, Z. Y. Jiang, C. Yang, J. W. Yu, J. R. Feng, M. A. Adil, D. Deng, W. J. Zou, J. Q. Zhang, K. Lu, W. Ma, F. Gao, Z. X. Wei, *Nat. Commun.* 2019, **10**, 5393.
14. J. Gao, J. Ge, R. Peng, C. Liu, L. Cao, D. Zhang, B. Fanady, L. Hong, E. Zhou, Z. Ge, *J. Mater. Chem. A* 2020, **8**, 7405.
15. B. B. Qiu, Z. Chen, S. C. Qin, J. Yao, W. C. Huang, L. Meng, H. M. Zhu, Y. Yang, Z. G. Zhang, Y. F. Li, *Adv. Mater.* 2020, **32**, 1908373.
16. Y. L. Wang, Y. Wang, L. Zhu, H. Q. Liu, J. Fang, X. Guo, F. Liu, Z. Tang, M. J. Zhang, Y. F. Li, *Energy Environ. Sci.* 2020, **13**, 1309.
17. Q. Yue, H. Wu, Z. Zhou, M. Zhang, F. Liu, X. Zhu, *Adv. Mater.* 2019, **31**, 1904283.
18. Z. Zhou, S. Xu, J. Song, Y. Jin, Q. Yue, Y. Qian, F. Liu, F. Zhang, X. Zhu, *Nat. Energy* 2018, **3**, 952.
19. H. Y. Chen, D. Q. Hu, Q. G. Yang, J. Gao, J. H. Fu, K. Yang, H. He, S. S. Chen, Z. P. Kan, T. N. Duan, C. Yang, J. Y. Ouyang, Z. Y. Xiao, K. Sun, S. R. Lu, *Joule* 2019, **3**, 3034.
20. J. Ge, L. Xie, R. Peng, B. Fanady, J. Huang, W. Song, T. Yan, W. Zhang, Z. Ge, *Angew. Chem. Int. Ed.* 2020, **59**, 2808.
